# Supplementary material for: Maternal spindle transfer overcomes embryo developmental arrest caused by ooplasmic defects in mice
Source: eLife. 2020 Apr 29;9:e48591. doi: 10.7554/eLife.48591 (PMC7259950; doi:10.7554/eLife.48591)
Supplement: Source data 1. [file elife-48591-data1.xlsx]

## Sheet: Supp File 1 - source data 1
Supplementary File 1-source data 1. Variant site coverages referring to Supplementary File 1.
Expected variant allele frequency (%)	Original coverage			Assessed coverage*			Variant allele coverage*
	1st sample aliquot	2nd sample aliquot	3rd sample aliquot	1st sample aliquot	2nd sample aliquot	3rd sample aliquot	1st sample aliquot	2nd sample aliquot	3rd sample aliquot
0	51613	51751	51523	19964	19979	19972	ND	ND	ND
2	47719	49901	48864	19996	19994	19999	311	338	220
4	48075	54025	38506	19992	19994	19995	674	688	631
6	47987	60812	57085	19990	19989	19987	1165	1109	1078
8	62788	63522	56097	19993	19993	19992	1449	1364	1260
10	89649	73293	75191	19974	19991	19990	2065	1750	1843
25	67082	87999	60129	19987	19984	19990	5262	4499	4909
50	44232	75236	66916	19938	19976	19977	10108	9939	10234
75	70064	69383	54099	19975	19969	19971	14392	14566	14653
100	57242	52808	68531	19866	19897	19920	19866	19897	19920
Mean variant site coverage	60070.7
SD	12347.3
*Variant analysis was performed at a depth of approximately 20,000 reads
ND = Not detected
