# Supplementary material for: Maternal spindle transfer overcomes embryo developmental arrest caused by ooplasmic defects in mice
Source: eLife. 2020 Apr 29;9:e48591. doi: 10.7554/eLife.48591 (PMC7259950; doi:10.7554/eLife.48591)
Supplement: Source data 2. [file elife-48591-data2.xlsx]

## Sheet: Supp File 2 - source data 1
Supplementary File 2-source data 1. Variant site coverages referring to Supplementary File 2.
Expected variant allele frequency (%)	Coverage										Variant allele coverage
	1st sample aliquot					2nd sample aliquot					1st sample aliquot					2nd sample aliquot
	m.2798	m.2814	m.3194	m.3260	m.3932	m.2798	m.2814	m.3194	m.3260	m.3932	m.2798	m.2814	m.3194	m.3260	m.3932	m.2798	m.2814	m.3194	m.3260	m.3932
0	319139	322967	88968	88604	202276	NA	NA	NA	NA	NA	ND	ND	ND	ND	ND	NA	NA	NA	NA	NA
1	307300	308400	96659	96112	218635	385069	387058	154481	153601	285926	5844	6369	1820	2187	4074	5970	6499	2481	3056	4371
3	404284	406165	181905	180835	297772	267571	268727	140982	140214	216586	13477	14145	6077	6803	9918	9829	10369	4503	5166	7427
10	342610	344793	110749	110419	220122	NA	NA	NA	NA	NA	34659	35602	11440	12012	22190	NA	NA	NA	NA	NA
25	398429	401375	158635	158456	294876	NA	NA	NA	NA	NA	92819	94539	38550	39697	68172	NA	NA	NA	NA	NA
50	507917	513133	200998	201869	343570	NA	NA	NA	NA	NA	219774	224914	92810	95108	162411	NA	NA	NA	NA	NA
Mean variant site coverage	255705
SD	116633
NA = Not applicable
ND = Not detected
