# Supplementary material for: Maternal spindle transfer overcomes embryo developmental arrest caused by ooplasmic defects in mice
Source: eLife. 2020 Apr 29;9:e48591. doi: 10.7554/eLife.48591 (PMC7259950; doi:10.7554/eLife.48591)
Supplement: Source data 3. [file elife-48591-data3.xlsx]

## Sheet: Supp File 3 - source data 1
Supplementary File 3-source data 1. Variant site coverages refering to Supplementary File 4.
Sample ID	Original coverage		Assessed coverage*		Allele coverage*
	Polar Body biopsy	Complementary embryo	Polar Body biopsy	Complementary embryo	Polar Body biopsy	Complementary embryo
Embryo 1	51293	55024	19996	19998	541	338
Embryo 2	56722	56001	19996	19819	1001	ND
Embryo 3	48291	37107	19986	19987	ND	ND
Embryo 4	52279	47071	19991	19843	552	ND
Embryo 5	59490	50094	19997	19998	643	379
Embryo 6	42633	58940	19993	19807	2832	ND
Embryo 7	40170	45593	19991	19891	ND	ND
Embryo 8	59669	58789	19997	19995	3150	318
Embryo 9	NA	54784	NA	19906	NA	ND
Embryo 10	49754	61759	19995	19921	2469	ND
Mean variant site coverage	51866.5
SD	7059.73
Sample ID	Original coverage		Assessed coverage*		Allele coverage*
	Blastomere biopsy	Complementary embryo	Blastomere biopsy	Complementary embryo	Blastomere biopsy	Complementary embryo
Embryo 1	109581	95931	19998	19998	237	284
Embryo 2	48246	110764	19877	19996	ND	351
Embryo 3	34725	79641	19998	20000	293	329
Embryo 4	80279	86511	19997	19997	259	381
Embryo 5	83632	98210	19837	19996	ND	323
Embryo 6	94973	68609	19997	19995	597	583
Embryo 7	58682	82596	19996	19997	313	477
Embryo 8	100179	100640	19997	19997	374	231
Mean variant site coverage	83324.9
SD	21590.5
Sample ID	Original coverage		Assessed coverage*		Allele coverage*
	Trophectoderm biopsy	Complementary embryo	Trophectoderm biopsy	Complementary embryo	Trophectoderm biopsy	Complementary embryo
Embryo 1	105729	111679	19993	19996	325	455
Embryo 2	88611	90146	19996	19998	533	553
Embryo 3	91732	77139	19829	19997	ND	217
Embryo 4	113252	66164	19999	19996	339	367
Embryo 5	14216	88127	14226	19999	206	373
Embryo 6	77041	61279	19999	19997	577	368
Embryo 7	75059	75918	20000	19998	445	508
Embryo 8	126690	94795	19989	19991	226	222
Mean variant site coverage	84848.6
SD	25951.5
*variant analysis was performed at a depth of approximately 20,000 reads
NA = Notapplicable
ND = Not detected
