# Supplementary material for: Maternal spindle transfer overcomes embryo developmental arrest caused by ooplasmic defects in mice
Source: eLife. 2020 Apr 29;9:e48591. doi: 10.7554/eLife.48591 (PMC7259950; doi:10.7554/eLife.48591)
Supplement: Source data 4. [file elife-48591-data4.xlsx]

## Sheet: Supp File 1 - source data 1
Supplementary File 1-source data 1. Variant site coverages referring to Supplementary File 1.
Expected variant allele frequency (%)	Original coverage			Assessed coverage*			Variant allele coverage*
	1st sample aliquot	2nd sample aliquot	3rd sample aliquot	1st sample aliquot	2nd sample aliquot	3rd sample aliquot	1st sample aliquot	2nd sample aliquot	3rd sample aliquot
0	51613	51751	51523	19964	19979	19972	ND	ND	ND
2	47719	49901	48864	19996	19994	19999	311	338	220
4	48075	54025	38506	19992	19994	19995	674	688	631
6	47987	60812	57085	19990	19989	19987	1165	1109	1078
8	62788	63522	56097	19993	19993	19992	1449	1364	1260
10	89649	73293	75191	19974	19991	19990	2065	1750	1843
25	67082	87999	60129	19987	19984	19990	5262	4499	4909
50	44232	75236	66916	19938	19976	19977	10108	9939	10234
75	70064	69383	54099	19975	19969	19971	14392	14566	14653
100	57242	52808	68531	19866	19897	19920	19866	19897	19920
Mean variant site coverage	60070.7
SD	12347.3
*Variant analysis was performed at a depth of approximately 20,000 reads
ND = Not detected

## Sheet: Supp File 5 - source data 1
Supplementary File 5 - source data 1. Variant site coverages refering to Supplementary File 5.
Male-F1.1					Male-F1.2					Male-F1.3
Sample ID	Original coverage	Assessed coverage*	Allele coverage*		Sample ID	Original coverage	Assessed coverage*	Allele coverage*		Sample ID	Original coverage	Assessed coverage*	Allele coverage*
Tail	62580	19987	411		Tail	78760	19918	ND		Tail	80102	19986	660
Heart	56163	19984	222		Heart	60560	19926	ND		Heart	68725	19977	457
Liver	56733	19986	576		Liver	50980	19942	ND		Liver	61883	19978	1132
Brain	87650	19983	435		Brain	62144	19953	ND		Brain	67093	19986	543
Kidney	72371	19979	508		Kidney	58741	19860	ND		Kidney	57055	19990	590
Male-F1.4					Female-F1.1					Female-F1.2
Sample ID	Original coverage	Assessed coverage*	Allele coverage*		Sample ID	Original coverage	Assessed coverage*	Allele coverage*		Sample ID	Original coverage	Assessed coverage*	Allele coverage*
Tail	80438	19978	484		Tail	56485	19998	438		Tail	49813	19994	392
Heart	68114	19978	446		Heart	50127	19993	374		Heart	68257	19994	225
Liver	48227	19988	865		Liver	71021	19995	630		Liver	63552	19998	480
Brain	112332	19986	645		Brain	48876	19992	439		Brain	73308	20000	242
Kidney	59476	19975	1106		Kidney	60709	19997	686		Kidney	64066	19997	532
Mean variant site coverage	65211.4
SD	13406.4
Female-F2.2					Male-F2.1					Female-F2.1
Sample ID	Original coverage	Assessed coverage*	Allele coverage*		Sample ID	Original coverage	Assessed coverage*	Allele coverage*		Sample ID	Original coverage	Assessed coverage*	Allele coverage*
Tail	51197	19916	ND		Tail	48784	19978	ND		Tail	61742	19970	ND
Heart	51145	19922	ND		Heart	35234	19978	ND		Heart	42946	19977	ND
Liver	55248	19987	227		Liver	59533	19978	ND		Liver	66791	19983	ND
Brain	8479	8454	ND		Brain	26141	19976	ND		Brain	34852	19990	ND
Kidney	35207	19837	196		Kidney	34695	19984	ND		Kidney	41950	19976	ND
Male-F2.2
Sample ID	Original coverage	Assessed coverage*	Allele coverage*
Tail	50229	19980	ND
Heart	90394	19967	ND
Liver	79961	19972	ND
Brain	52879	19979	ND
Kidney	62810	19986	ND
Mean variant site coverage	49510.8
SD	18564
Female-F3.1					Male-F3.1					Female-F3.2
Sample ID	Original coverage	Assessed coverage*	Allele coverage*		Sample ID	Original coverage	Assessed coverage*	Allele coverage*		Sample ID	Original coverage	Assessed coverage*	Allele coverage*
Tail	55301	19978	ND		Tail	51905	19974	ND		Tail	51791	19970	ND
Heart	62364	19980	ND		Heart	66634	19972	ND		Heart	44672	19978	ND
Liver	63471	19975	ND		Liver	136972	19972	ND		Liver	44633	19984	ND
Brain	115617	19984	ND		Brain	69614	19982	ND		Brain	74774	19975	ND
Kidney	51084	19965	ND		Kidney	77569	19983	ND		Kidney	47119	19978	ND
Male-F3.2
Sample ID	Original coverage	Assessed coverage*	Allele coverage*
Tail	41615	19979	ND
Heart	52061	19979	ND
Liver	57725	19973	ND
Brain	32250	19973	ND
Kidney	48202	19973	ND
Mean variant site coverage	62268.7
SD	24903
Female-F4.1					Male-F4.1					Female-F4.2
Sample ID	Original coverage	Assessed coverage*	Allele coverage*		Sample ID	Original coverage	Assessed coverage*	Allele coverage*		Sample ID	Original coverage	Assessed coverage*	Allele coverage*
Tail	40768	19979	ND		Tail	44594	19977	ND		Tail	51967	19965	ND
Heart	46399	19974	ND		Heart	44866	19972	ND		Heart	40818	19985	ND
Liver	56995	19982	ND		Liver	55662	19983	ND		Liver	60359	19975	ND
Brain	37872	19974	ND		Brain	26784	19974	ND		Brain	36463	19979	ND
Kidney	31300	19986	ND		Kidney	28954	19985	ND		Kidney	42426	19976	ND
Male-F4.2
Sample ID	Original coverage	Assessed coverage*	Allele coverage*
Tail	66436	19964	ND
Heart	66287	19971	ND
Liver	86251	19975	ND
Brain	88165	19979	ND
Kidney	47412	19975	ND
Mean variant site coverage	50038.9
SD	16955.6
Female-F5.1					Male-F5.1					Female-F5.2
Sample ID	Original coverage	Assessed coverage*	Allele coverage*		Sample ID	Original coverage	Assessed coverage*	Allele coverage*		Sample ID	Original coverage	Assessed coverage*	Allele coverage*
Tail	67178	19973	ND		Tail	42839	19977	ND		Tail	43776	19977	ND
Heart	56339	19973	ND		Heart	86200	19976	ND		Heart	42909	19976	ND
Liver	82982	19984	ND		Liver	57042	19975	ND		Liver	77555	19985	ND
Brain	102943	19972	ND		Brain	56796	19979	ND		Brain	29249	19979	ND
Kidney	46068	19979	ND		Kidney	40699	19985	ND		Kidney	41160	19980	ND
Male-F5.2
Sample ID	Original coverage	Assessed coverage*	Allele coverage*
Tail	56765	19974	ND
Heart	51360	19970	ND
Liver	74277	19974	ND
Brain	58511	19984	ND
Kidney	50711	19983	ND
Mean variant site coverage	58267.9
SD	18475.2
*variant analysis was performed at a depth of approximately 20,000 reads
ND = Not detected
