# Supplementary material for: Maternal spindle transfer overcomes embryo developmental arrest caused by ooplasmic defects in mice
Source: eLife. 2020 Apr 29;9:e48591. doi: 10.7554/eLife.48591 (PMC7259950; doi:10.7554/eLife.48591)
Supplement: Source data 5. [file elife-48591-data5.xlsx]

## Sheet: Supp File 6 - source data 1
Supplementary File 6 - source data 1. Variant site coverages referring to Supplementary File 6.
Male-F1.1
Sample ID	Coverage					Allele coverage
	m.2798	m.2814	m.3194	m.3260	m.3932	m.2798	m.2814	m.3194	m.3260	m.3932
Tail	265116	266737	113485	112654	205699	6811	7151	2885	3252	5503
Heart	408223	410183	144592	143610	247695	6405	6850	2530	3146	4196
Liver	305930	307271	120676	119979	226287	9619	9911	3628	4175	7080
Brain	412132	414304	115274	114636	269775	11445	11628	3376	3918	7833
Kidney	432860	435026	165991	165111	272014	12824	13195	5110	5796	8763
Mean variant site coverage	247810
SD	116574
Male-F2.1
Sample ID	Coverage					Allele coverage
	m.2798	m.2814	m.3194	m.3260	m.3932	m.2798	m.2814	m.3194	m.3260	m.3932
Tail	370375	372522	132681	132049	259807	5263	5748	1988	2487	4098
Heart	356911	358545	119671	118784	261537	4156	4658	1273	1806	3092
Liver	286105	287663	136065	135272	235279	4979	5444	2147	2683	4336
Brain	326819	322696	120900	120369	275596	ND	ND	ND	1566	ND
Kidney	417317	420702	166608	165595	304005	5591	5820	2131	2792	4232
Mean variant site coverage	248155
SD	104734
Male-F3.1
Sample ID	Coverage					Allele coverage
	m.2798	m.2814	m.3194	m.3260	m.3932	m.2798	m.2814	m.3194	m.3260	m.3932
Tail	626725	629465	259289	258254	465077	7189	8102	ND	3573	5308
Heart	299250	302860	123954	123338	232551	ND	ND	ND	ND	ND
Liver	299768	303279	105103	104606	232597	ND	ND	ND	ND	ND
Brain	376967	381326	111305	110812	260783	ND	ND	ND	ND	ND
Kidney	402269	406554	161190	160481	279176	ND	ND	ND	ND	ND
Mean variant site coverage	280679
SD	148681
