# Supplementary material for: Maternal spindle transfer overcomes embryo developmental arrest caused by ooplasmic defects in mice
Source: eLife. 2020 Apr 29;9:e48591. doi: 10.7554/eLife.48591 (PMC7259950; doi:10.7554/eLife.48591)
Supplement: Supplementary file 1. — Allele frequencies at position m.3932 in homoplasmic samples and artificially constructed heteroplasmic sample mixtures. See also Source data 1. [file elife-48591-supp1.xlsx]

## Sheet: Supplementary File 1
Supplementary File 1 - Validation of established sequencing protocol for mtDNA carryover analysis measured by Ion PGM sequencer. Allele frequencies at position m.3932 in homoplasmic samples and artificially constructed heteroplasmic sample mixtures. See also Supplementary File 1-source data 1.
Expected variant allele frequency after mixing of homoplasmic samples at differing ratios (%)	Obtained variant allele frequency (%)*
	1st sample aliquot	2nd sample aliquot	3rd sample aliquot	MEAN ± SD
0	ND	ND	ND	NA
2	1.6	1.7	1.1	1.5 ± 0.3
4	3.4	3.4	3.2	3.3 ± 0.1
6	5.8	5.5	5.4	5.6 ± 0.2
8	7.2	6.8	6.3	6.8 ± 0.5
10	10.3	8.8	9.2	9.4 ± 0.8
25	26.3	22.5	24.6	24.5 ± 1.9
50	50.7	49.8	51.2	50.6 ± 0.7
75	72.1	72.9	73.4	72.8 ± 0.7
100	100	100	100	100.0 ± 0.0
*The variant allele frequency refers to the percentage of observed A alleles. Mean coverage of alleles at the variant site was 60,071 ± 12,347, ranging from 38,506 to 89,649. SD = standad deviation. ND = Not detected. NA = Not applicable.
