# Supplementary material for: Maternal spindle transfer overcomes embryo developmental arrest caused by ooplasmic defects in mice
Source: eLife. 2020 Apr 29;9:e48591. doi: 10.7554/eLife.48591 (PMC7259950; doi:10.7554/eLife.48591)
Supplement: Supplementary file 2. — Allele frequencies at positions m.2798, m.2814, m.3194, m.3260 and m.3932 in homoplasmic samples and artificially constructed heteroplasmic sample mixtures. See also Source data 2. [file elife-48591-supp2.xlsx]

## Sheet: Supplementary File 2
Supplementary File 2 - Validation of established sequencing protocol for mtDNA carryover analysis using MiSeq sequencer. Allele frequencies at positions m.2798, m.2814, m.3194, m.3260 and m.3932 in homoplasmic samples and artificially constructed heteroplasmic sample mixtures. See also Supplementary File 2-source data 1.
Expected variant allele frequency after mixing of homoplasmic samples at differing ratios (%)	Obtained variant allele frequency (%)*
	1st sample aliquot						2nd sample aliquot
	m.2798T**	m.2814C**	m.3194C**	m.3260G**	m.3932G**	MEAN ± SD	m.2798T**	m.2814C**	m.3194C**	m.3260G**	m.3932G**	MEAN ± SD
0	ND	ND	ND	ND	ND	NA	NA	NA	NA	NA	NA	NA
1	1.9	2.06	1.88	2.27	1.86	1.99 ± 0.17	1.55	1.68	1.6	1.99	1.53	1.67 ± 0.19
3	3.33	3.48	3.34	3.76	3.33	3.45 ± 0.19	3.67	3.86	3.19	3.68	3.43	3.57 ± 0.26
10	10.11	10.32	10.32	10.87	10.08	10.34 ± 0.32	NA	NA	NA	NA	NA	NA
25	22.28	23.54	24.28	25.04	23.11	23.65 ± 1.06	NA	NA	NA	NA	NA	NA
50	43.23	43.8	46.14	47.08	47.25	45.50 ± 1.87	NA	NA	NA	NA	NA	NA
*The variant allele frequencies refer to percentages of observed NZB alleles. Mean coverage of alleles at the variant sites was 255,705 ± 116,633, ranging from 88,604 to 513,133. **SNPs m.2798 and m.2814 as well as SNPs m.3194 and m.3260 were located on a single amplicon. SD = standad deviation. ND = Not detected. NA = Not applicable.
