# Supplementary material for: Maternal spindle transfer overcomes embryo developmental arrest caused by ooplasmic defects in mice
Source: eLife. 2020 Apr 29;9:e48591. doi: 10.7554/eLife.48591 (PMC7259950; doi:10.7554/eLife.48591)
Supplement: Supplementary file 3. — Allele frequencies at position m.3932 are shown. See also Source data 3. [file elife-48591-supp3.xlsx]

## Sheet: Supplementary File 3
Supplementary File 3 - mtDNA heteroplasmy analysis of biopsies and complementary embryos using Ion PGM platform. Allele frequencies at position m.3932 are shown. See also Supplementary File 3-data source 1.
Sample ID	2-cell embryo stage		Morula stage		Blastocyst stage
	Polar Body biopsy	Complementary embryo	Blastomere biopsy	Complementary embryo	Trophectoderm biopsy	Complementary embryo
Embryo 1	2.7	1.7	1.2	1.4	1.6	2.3
Embryo 2	5	ND	0	1.8	2.7	2.8
Embryo 3	ND	ND	1.5	1.6	ND	1.1
Embryo 4	2.8	ND	1.3	1.9	1.7	1.8
Embryo 5	3.2	1.9	ND	1.6	1.4	1.9
Embryo 6	14.2	ND	3	2.9	2.9	1.8
Embryo 7	ND	ND	1.6	2.4	2.2	2.5
Embryo 8	15.8	1.6	1.9	1.2	1.1	1.1
Embryo 9	ND	ND	n/a	n/a	n/a	n/a
Embryo 10	12.3	ND	n/a	n/a	n/a	n/a
MEAN (±SD)	6.2 (±6.2)	0.5 (±0.8)	1.3 (±1.0)	1.9 (±0.6)	1.7 (±0.9)	1.9 (±0.6)
Mean coverages of alleles at the variant site were 51,866.5 ± 7,059.7, 83,324.9 ± 21,590.1 and 84,848.6 ± 25,951.5 ranging from 37,107.0 to 61,759.0, 34,725.0 to 110,764.0 and 14,216.0 to 126,690 in 2-cell embryo, morula and blastocyst stage specimens, respectively. n/a = non applicable. ND = Not detected
