# Supplementary material for: Maternal spindle transfer overcomes embryo developmental arrest caused by ooplasmic defects in mice
Source: eLife. 2020 Apr 29;9:e48591. doi: 10.7554/eLife.48591 (PMC7259950; doi:10.7554/eLife.48591)
Supplement: Supplementary file 4. [file elife-48591-supp4.xlsx]

## Sheet: Supplementary File 4
Supplementary File 4: Analysis of fertility and developmental potential of MST litters through 5 generations.
MST mouse ID	Number of pups/litter	Number of males	Number of females
F1-Female1	10	6	4
F1-Female2	9	6	3
F1-Female3	7	1	6
F1-Male1	9	8	1
F1-Male2	7	5	2
F1-Male3	8	5	3
F1-Male4	9	4	5
F1-Male5	5	3	2
F1-Male6	7	4	3
F1-Male7	7	4	3
Total number of mice analysed (%)	78	46 (59,0%)	32 (41.0%)
MST mouse ID	Number of pups/litter	Number of males	Number of females
F2-Female1	7	2	5
F2-Female2	6	5	0
F2-Female3	5	0	6
F2-Female4	6	3	3
F2-Female5	8	3	5
F2-Female6	9	9	0
F2-Female7	10	0	10
F2-Male1	8	3	5
F2-Male2	8	4	4
Total number of mice analysed (%)	67	29 (43,3%)	38 (56.7%)
MST mouse ID	Number of pups/litter	Number of males	Number of females
F3-Female21	6	3	3
F3-Female6	7	2	5
F3-Male15	8	4	4
F3-Male4	8	3	5
Total number of mice analysed (%)	29	12 (41,4%)	17 (58,6%)
MST mouse ID	Number of pups/litter	Number of males	Number of females
F4-Female1	9	3	6
F4-Female3	7	4	3
F4-Male1	8	6	2
F4-Male7	8	4	4
Total number of mice analysed (%)	32	17 (53,1%)	15 (46.9%)
MST mouse ID	Number of pups/litter	Number of males	Number of females
F5-Female3	9	7	3
F5-Female5	7	2	5
F5-Male6	9	6	4
F5-Male8	8	4	4
Total number of mice analysed (%)	33	19 (57,6%)	16 (48,4%)
