# Supplementary material for: Maternal spindle transfer overcomes embryo developmental arrest caused by ooplasmic defects in mice
Source: eLife. 2020 Apr 29;9:e48591. doi: 10.7554/eLife.48591 (PMC7259950; doi:10.7554/eLife.48591)
Supplement: Supplementary file 5. — See also Source data 4. [file elife-48591-supp5.xlsx]

## Sheet: Supplementary File 5
Supplementary File 5 - Allele frequencies at position m.3932 in adult MST mouse tissues through 5 generations using Ion PGM platform. See also Supplementary File 5-data source 1.
Generation	MST mouse ID	Allele frequency (mtDNA heteroplasmy)
		Tail	Heart	Liver	Brain	Kidney	Mean	±SD
F1	Male-F1.1	2.1	1.1	2.9	2.2	2.5	2.16	0.669328
	Male-F1.2	ND	ND	ND	ND	ND	NA	NA
	Male-F1.3	3.3	2.3	5.7	2.7	3	3.4	1.33791
	Male-F1.4	2.4	2.2	4.3	3.2	5.5	3.52	1.38094
	Female-F1.1	2.2	1.9	3.2	2.2	3.4	2.58	0.672309
	Female-F1.2	2	1.1	2.4	1.2	2.7	1.88	0.712039
	Mean ±SD	2.0 ± 1.09	1.43 ± 0.88	3.08 ± 1.92	1.92 ± 1.15	2.85 ± 1.76	2.257 ± 0.795
Generation	MST mouse ID	Allele frequency (mtDNA heteroplasmy)
		Tail	Heart	Liver	Brain	Kidney	Mean	±SD
F2	Male-F2.1	ND	ND	1.1	ND	1	0.4	0.6
	Male-F2.2	ND	ND	ND	ND	ND	NA	NA
	Female-F2.1	ND	ND	ND	ND	ND	NA	NA
	Female-F2.2	ND	ND	ND	ND	ND	NA	NA
	Mean ±SD	ND	ND	0.275 ± 0.55	ND	0.2 ± 0.45	0.105 ± 0.144
Generation	MST mouse ID	Allele frequency (mtDNA heteroplasmy)
		Tail	Heart	Liver	Brain	Kidney	Mean	±SD
F3	Male-F3.1	ND	ND	ND	ND	ND	NA	NA
	Male-F3.2	ND	ND	ND	ND	ND	NA	NA
	Female-F3.1	ND	ND	ND	ND	ND	NA	NA
	Female-F3.2	ND	ND	ND	ND	ND	NA	NA
	Mean ±SD	ND	ND	ND	ND	ND	0
Generation	MST mouse ID	Allele frequency (mtDNA heteroplasmy)
		Tail	Heart	Liver	Brain	Kidney	Mean	±SD
F4	Male-F4.1	ND	ND	ND	ND	ND	NA	NA
	Male-F4.2	ND	ND	ND	ND	ND	NA	NA
	Female-F4.1	ND	ND	ND	ND	ND	NA	NA
	Female-F4.2	ND	ND	ND	ND	ND	NA	NA
	Mean ±SD	ND	ND	ND	ND	ND	0
Generation	MST mouse ID	Allele frequency (mtDNA heteroplasmy)
		Tail	Heart	Liver	Brain	Kidney	Mean	±SD
F5	Male-F5.1	ND	ND	ND	ND	ND	NA	NA
	Male-F5.2	ND	ND	ND	ND	ND	NA	NA
	Female-F5.1	ND	ND	ND	ND	ND	NA	NA
	Female-F5.2	ND	ND	ND	ND	ND	NA	NA
	Mean ±SD	ND	ND	ND	ND	ND	0
Mean coverages of alleles at the variant site were 65,211.4 ± 13,406.4, 49,510.9 ± 18,564.0, 62,268.7 ± 24,903.0, 50,038.9 ± 16,955.6 and 58,268.0 ± 18,475.2 ranging from 48,227.0 to 112,332.0, 8,479.0 to 90,394.0, 32,250.0 to 136,972, 26,784.0 to 88,165.0 and 29,249.0 to 102,943.0 in generatons F1, F2, F3, F4 and F5, respectively. NA = Not applicable. ND = Not detected.
