# Supplementary material for: Maternal spindle transfer overcomes embryo developmental arrest caused by ooplasmic defects in mice
Source: eLife. 2020 Apr 29;9:e48591. doi: 10.7554/eLife.48591 (PMC7259950; doi:10.7554/eLife.48591)
Supplement: Supplementary file 6. — Allele frequencies at positions m.2798, m.2814, m.3194, m.3260 and m.3932 in adult MST mouse tissues. See alsoSource data 5. [file elife-48591-supp6.xlsx]

## Sheet: Supplementary File 6
Supplementary File 6 - Validation of established sequencing protocol for mtDNA carryover analysis using MiSeq platform. Allele frequencies at positions m.2798, m.2814, m.3194, m.3260 and m.3932 in adult MST mouse tissues. See also Supplementary File 6-data source 1.
Generation	MST mouse ID	Allele frequency (mtDNA heteroplasmy)
		Tail						Heart						Liver						Brain						Kidney
		m.2798T*	m.2814C*	m.3194C*	m.326G*	m.3932G*	MEAN ± SD	m.2798T*	m.2814C*	m.3194C*	m.3260G*	m.3932G*	MEAN ± SD	m.2798T*	m.2814C*	m.3194C*	m.3260G*	m.3932G*	MEAN ± SD	m.2798T*	m.2814C*	m.3194C*	m.3260G*	m.3932G*	MEAN ± SD	m.2798T*	m.2814C*	m.3194C*	m.3260G*	m.3932G*	MEAN ± SD
1	Male-F1.1*	2.57	2.68	2.54	2.89	2.67	2.67 ± 0.14	1.57	1.67	1.75	2.19	1.69	1.77 ± 0.24	3.14	3.22	3	3.48	3.13	3.19 ± 0.18	2.78	2.81	2.93	3.42	2.9	2.97 ± 0.26	2.96	3.03	3.08	3.51	3.22	3.16 ± 0.22
2	Male-F2.1*	1.42	1.54	1.5	1.88	1.58	1.58 ±0.18	1.16	1.3	1.06	1.52	1.18	1.24 ± 0.18	1.74	1.89	1.58	1.98	1.84	1.81 ± 0.15	ND	ND	ND	1.3	ND	0.26 ± 0.58	1.34	1.38	1.28	1.69	1.39	1.42 ± 0.16
3	Male-F3.1*	1.15	1.29	ND	1.38	1.14	0.99 ± 0.56	ND	ND	ND	ND	ND	NA	ND	ND	ND	ND	ND	NA	ND	ND	ND	ND	ND	NA	ND	ND	ND	ND	ND	NA
Mean coverage of alleles at the variant sites was 258,881 ± 123,997, ranging from 104,606 to 629,465. *SNPs m.2798 and m.2814 as well as SNPs m.3194 and m.3260 were located on a single amplicon. SD = standad deviation. ND = Not detected. NA = Not applicable.
